# Supplementary material
Source: Springer Nature journal article supplement (https://www.springermedizin.de/resource/supplementary/12985_2010_840_MOESM1_ESM.pdf/9609314)

**A.**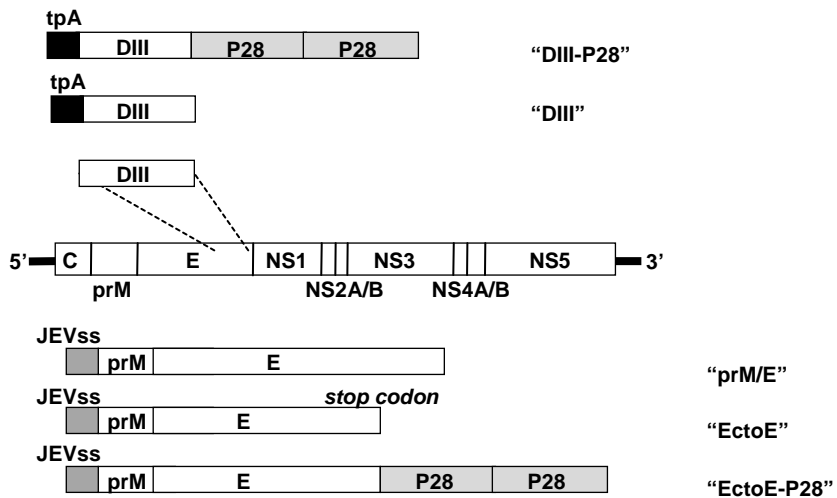**B.**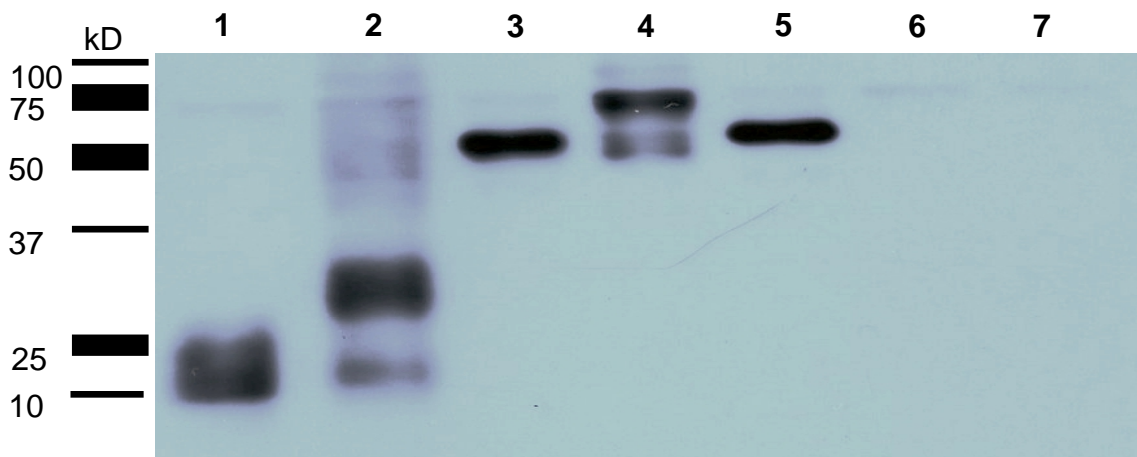

Supplement: MOESM1 [file 9609314]
